# Supplementary material for: Projected costs associated with school-based screening to inform deployment of Dengvaxia: Vietnam as a case study
Source: PubMed Central journal article supplement (PMC6092611; doi:10.1093/trstmh/try057), 2018-07-03
Supplement: try057_dengue_screening_paper_supporting_info.pdf [file try057_dengue_screening_paper_supporting_info.pdf]

*Projected costs associated with school-based screening to inform deployment of Dengvaxia:  
Vietnam as a case study*

# **Supporting information**

*Projected costs associated with school-based screening to inform deployment of Dengvaxia:  
Vietnam as a case study*

**Supporting Table S1: Assumed useful lifespan of the capital equipment**

| <b>Equipment</b>       | <b>Lifespan (years)</b> |
|------------------------|-------------------------|
| Centrifuge             | 5                       |
| Label printer          | 2                       |
| Plate washer           | 5                       |
| Plate reader           | 5                       |
| Autoclave              | 10                      |
| Single-channel pipette | 2                       |
| Multi-channel pipette  | 2                       |
| Plate incubator        | 5                       |
| Freezer                | 5                       |

*Projected costs associated with school-based screening to inform deployment of Dengvaxia:  
Vietnam as a case study*

**Supporting Table S2: The assumed inputs and unit costs for the school-based serosurvey**

| <b>Item</b>                                                | <b>Total quantity</b> | <b>Unit cost (VND)</b> | <b>Unit cost (US\$)</b> |
|------------------------------------------------------------|-----------------------|------------------------|-------------------------|
| <b>Community sensitization</b>                             |                       |                        |                         |
| Local doctor (Workdays)                                    | 12                    | 445,824                | 20.14                   |
| Travel (km)                                                | 2,520                 | 2,500                  | 0.11                    |
| Parental consent form                                      | 243                   | 140                    | 0.01                    |
| <b>Specimen collection</b>                                 |                       |                        |                         |
| <i>Staff</i>                                               |                       |                        |                         |
| Nurse (Workdays)                                           | 48                    | 428,896                | 19.55                   |
| Local doctor (Workdays)                                    | 12                    | 465,440                | 21.22                   |
| Field supervisor (Workdays)                                | 12                    | 465,440                | 21.22                   |
| <i>Transportation</i>                                      |                       |                        |                         |
| Travel (km)                                                | 4,320                 | 2,500                  | 0.11                    |
| <i>Consumables</i>                                         |                       |                        |                         |
| Lab coats                                                  | 6                     | 280,000                | 12.65                   |
| Tube holding rack                                          | 6                     | 70,000                 | 3.16                    |
| Alcohol container                                          | 6                     | 30,000                 | 1.36                    |
| Waste collection box                                       | 3                     | 165,000                | 7.45                    |
| Tourniquet                                                 | 9                     | 8,000                  | 0.36                    |
| Marker pen/pen                                             | 6                     | 25,000                 | 1.13                    |
| Cool pack                                                  | 36                    | 5,000                  | 0.23                    |
| Sample transport box                                       | 6                     | 120,000                | 5.42                    |
| Ethanol (ml)                                               | 1,069                 | 22                     | 0.001                   |
| Waste collection bag                                       | 108                   | 1,300                  | 0.06                    |
| Sharp container                                            | 4                     | 30,000                 | 1.36                    |
| Hand sanitizer (ml)                                        | 360                   | 176                    | 0.01                    |
| Cotton ball                                                | 2,138                 | 16                     | 0.001                   |
| Needle                                                     | 972                   | 810                    | 0.04                    |
| Vacutainer holder                                          | 10                    | 250                    | 0.01                    |
| Blood collection tube                                      | 1,069                 | 1,470                  | 0.07                    |
| Bandaid                                                    | 1,069                 | 480                    | 0.02                    |
| Collection tube label                                      | 1,069                 | 20                     | 0.001                   |
| Specimen collection form                                   | 49                    | 140                    | 0.01                    |
| Latex gloves (pair)                                        | 288                   | 1,554                  | 0.07                    |
| Disposable syringe                                         | 1,069                 | 810                    | 0.04                    |
| Register book                                              | 0.4                   | 24,000                 | 1.08                    |
| Absorbent paper (roll)                                     | 12                    | 44,000                 | 1.99                    |
| Bleach solution (ml)                                       | 72                    | 6,600                  | 0.30                    |
| <b>Specimen processing and testing</b>                     |                       |                        |                         |
| <i>Staff</i>                                               |                       |                        |                         |
| Specimen reception/processing - Lab technician (Work days) | 9                     | 387,360                | 17.66                   |
| Specimen testing - Lab technician (Work days)              | 7                     | 387,360                | 17.66                   |
| <i>Equipment<sup>a</sup></i>                               |                       |                        |                         |
| Serum separation centrifuge                                | 1                     | 1,194,000              | 54.43                   |
| Label printer                                              | 1                     | 112,500                | 5.13                    |
| Plate washer                                               | 1                     | 935,000                | 42.63                   |
| Plate reader                                               | 1                     | 1,737,400              | 79.21                   |
| Autoclave                                                  | 1                     | 597,842                | 27.26                   |
| Single-channel pipettes (200 µl, 1000 µl)                  | 2                     | 119,500                | 5.45                    |
| Multi-channel pipette                                      | 1                     | 358,750                | 16.36                   |
| Plate incubator                                            | 1                     | 459,261                | 20.94                   |
| Freezer for specimen storage                               | 1                     | 113,000                | 5.15                    |

*Projected costs associated with school-based screening to inform deployment of Dengvaxia:  
Vietnam as a case study*

|                                                        |        |            |        |
|--------------------------------------------------------|--------|------------|--------|
| Instrument maintenance cost                            | 1      | 400,000    | 18.24  |
| <u>Consumables</u>                                     |        |            |        |
| Specimen reception/processing - Hand sanitizer/ (ml)   | 48     | 176        | 0.01   |
| Specimen reception/processing - Gloves                 | 24     | 15,540     | 0.70   |
| Specimen reception/processing - Register book          | 0.1    | 24,000     | 1.08   |
| Specimen reception/processing - Specimen shipment form | 49     | 140        | 0.01   |
| Specimen reception/processing - Latex gloves (pair)    | 48     | 15,540     | 0.70   |
| Specimen reception/processing - Pipette (disposable)   | 1,069  | 1,062      | 0.05   |
| Specimen reception/processing - Cryotube               | 1,069  | 3,520      | 0.16   |
| Specimen reception/processing - Cryotube label         | 1,069  | 15         | 0.0007 |
| Specimen reception/processing - 81 tube box            | 12     | 100,000    | 4.52   |
| Specimen reception/processing - Autoclave bag          | 24     | 1,300      | 0.06   |
| Specimen reception/processing - Waste bin              | 2      | 165,000    | 7.45   |
| Specimen reception/processing - Register book          | 0.4    | 24,000     | 1.08   |
| Specimen reception/processing - Marker                 | 12     | 2,500      | 0.11   |
| Specimen testing - Hand sanitizer (ml)                 | 48     | 176        | 0.01   |
| Specimen testing - Latex gloves (pair)                 | 48     | 1,554      | 0.07   |
| Specimen testing - Lab coat for technician             | 1      | 280,000    | 12.65  |
| Specimen testing - Discard beaker                      | 2      | 35,000     | 1.58   |
| Specimen testing - Bleach solution (ml)                | 24     | 6,600      | 0.30   |
| Specimen testing - Absorbent paper                     | 2      | 44,000     | 1.99   |
| Specimen testing - Dilution tray                       | 48     | 21,895     | 0.99   |
| Specimen testing - Pipette tips (200 µl)               | 1,604  | 168        | 0.01   |
| Specimen testing - Pipette tips (1000 µl)              | 120    | 189        | 0.01   |
| Specimen testing - Distilled water (ml)                | 24,000 | 3          | 0.0001 |
| Specimen testing - ELISA kit                           | 13     | 10,405,236 | 470.00 |
| Specimen testing - Register book                       | 0.1    | 24,000     | 1.08   |
| Specimen testing - Waste bag                           | 36     | 1,300      | 0.06   |
| Sample decontamination - Waste disposal                | 1      | 40,000     | 1.81   |

*VND: Vietnamese dong. <sup>a</sup> The unit costs for the laboratory equipment have been annualized and account for the proportion the equipment would be used for used for the serosurvey (5%). Values are in 2016 prices.*

*Projected costs associated with school-based screening to inform deployment of Dengvaxia:  
Vietnam as a case study*

**Supporting Table S3: The assumed inputs and unit costs for the school-based individual screening strategy**

| <b>Item</b>                                                | <b>Total quantity</b> | <b>Unit cost<br/>(VND)</b> | <b>Unit cost<br/>(US\$)</b> |
|------------------------------------------------------------|-----------------------|----------------------------|-----------------------------|
| <b>Specimen collection</b>                                 |                       |                            |                             |
| <i>Staff</i>                                               |                       |                            |                             |
| Nurse (Workdays)                                           | 972                   | 428,896                    | 19.55                       |
| Local doctor (Workdays)                                    | 243                   | 465,440                    | 21.22                       |
| Field supervisor (Workdays)                                | 243                   | 465,440                    | 21.22                       |
| <i>Transportation</i>                                      |                       |                            |                             |
| Travel (km)                                                | 65,610                | 2,500                      | 0.11                        |
| <i>Consumables</i>                                         |                       |                            |                             |
| Lab coats                                                  | 12                    | 280,000                    | 12.65                       |
| Tube holding rack                                          | 12                    | 70,000                     | 3.16                        |
| Alcohol container                                          | 12                    | 30,000                     | 1.36                        |
| Waste collection box                                       | 6                     | 165,000                    | 7.45                        |
| Tourniquet                                                 | 18                    | 8,000                      | 0.36                        |
| Marker pen/pen                                             | 12                    | 25,000                     | 1.13                        |
| Cool pack                                                  | 36                    | 5,000                      | 0.23                        |
| Sample transport box                                       | 12                    | 120,000                    | 5.42                        |
| Ethanol (ml)                                               | 23,522                | 22                         | 0.001                       |
| Waste collection bag                                       | 2,187                 | 1,300                      | 0.06                        |
| Sharp container                                            | 73                    | 30,000                     | 1.36                        |
| Hand sanitizer (ml)                                        | 7,290                 | 176                        | 0.01                        |
| Cotton ball                                                | 47,045                | 16                         | 0.001                       |
| Needle                                                     | 21,384                | 810                        | 0.04                        |
| Vacutainer holder                                          | 214                   | 250                        | 0.01                        |
| Blood collection tube                                      | 23,522                | 1,470                      | 0.07                        |
| Bandaid                                                    | 23,522                | 480                        | 0.02                        |
| Collection tube label                                      | 23,522                | 20                         | 0.001                       |
| Specimen collection form                                   | 1,069                 | 140                        | 0.01                        |
| Latex gloves (pair)                                        | 5,832                 | 1,554                      | 0.07                        |
| Disposable syringe                                         | 23,522                | 810                        | 0.04                        |
| Register book                                              | 7                     | 24,000                     | 1.08                        |
| Absorbent paper (roll)                                     | 243                   | 44,000                     | 1.99                        |
| Bleach solution (ml)                                       | 1,458                 | 6,600                      | 0.30                        |
| <b>Specimen processing and testing</b>                     |                       |                            |                             |
| <i>Staff</i>                                               |                       |                            |                             |
| Specimen reception/processing - Lab technician (Work days) | 182                   | 387,360                    | 17.66                       |
| Specimen testing - Lab technician (Work days)              | 144                   | 387,360                    | 17.66                       |
| <i>Equipment<sup>a</sup></i>                               |                       |                            |                             |
| Serum separation centrifuge                                | 1                     | 23,880,000                 | 1088.67                     |
| Label printer                                              | 1                     | 2,250,000                  | 102.58                      |
| Plate washer                                               | 1                     | 18,700,000                 | 852.52                      |
| Plate reader                                               | 1                     | 34,748,000                 | 1584.13                     |
| Autoclave                                                  | 1                     | 11,956,833                 | 545.10                      |

*Projected costs associated with school-based screening to inform deployment of Dengvaxia:  
Vietnam as a case study*

|                                                        |         |            |        |
|--------------------------------------------------------|---------|------------|--------|
| Single-channel pipettes (200 µl, 1000 µl)              | 1       | 2,390,000  | 108.96 |
| Multi-channel pipette                                  | 2       | 7,175,000  | 327.10 |
| Plate incubator                                        | 1       | 9,185,220  | 418.75 |
| Freezer for specimen storage                           | 1       | 2,260,000  | 103.03 |
| Instrument maintenance cost                            | 1       | 8,000,000  | 364.71 |
| <i>Consumables</i>                                     |         |            |        |
| Specimen reception/processing - Hand sanitizer/ (ml)   | 972     | 176        | 0.01   |
| Specimen reception/processing - Gloves                 | 486     | 15,540     | 0.70   |
| Specimen reception/processing - Register book          | 2       | 24,000     | 1.08   |
| Specimen reception/processing - Specimen shipment form | 1,069   | 140        | 0.01   |
| Specimen reception/processing - Latex gloves (pair)    | 972     | 15,540     | 0.70   |
| Specimen reception/processing - Pipette (disposable)   | 23,522  | 1,062      | 0.05   |
| Specimen reception/processing - Cryotube               | 23,522  | 3,520      | 0.16   |
| Specimen reception/processing - Cryotube label         | 23,522  | 15         | 0.001  |
| Specimen reception/processing - 81 tube box            | 264     | 100,000    | 4.52   |
| Specimen reception/processing - Autoclave bag          | 486     | 1,300      | 0.06   |
| Specimen reception/processing - Waste bin              | 2       | 165,000    | 7.45   |
| Specimen reception/processing - Register book          | 7       | 24,000     | 1.08   |
| Specimen reception/processing - Marker                 | 12      | 2,500      | 0.11   |
| Specimen testing - Hand sanitizer (ml)                 | 972     | 176        | 0.01   |
| Specimen testing - Latex gloves (pair)                 | 972     | 1,554      | 0.07   |
| Specimen testing - Lab coat for technician             | 1       | 280,000    | 12.65  |
| Specimen testing - Discard beaker                      | 2       | 35,000     | 1.58   |
| Specimen testing - Bleach solution (ml)                | 486     | 6,600      | 0.30   |
| Specimen testing - Absorbent paper                     | 49      | 44,000     | 1.99   |
| Specimen testing - Dilution tray                       | 972     | 21,895     | 0.99   |
| Specimen testing - Pipette tips (200 µl)               | 35,284  | 168        | 0.01   |
| Specimen testing - Pipette tips (1000 µl)              | 2,430   | 189        | 0.01   |
| Specimen testing - Distilled water (ml)                | 486,000 | 3          | 0.0001 |
| Specimen testing - ELISA kit                           | 287     | 10,405,236 | 470.00 |
| Specimen testing - Register book                       | 2       | 24,000     | 1.08   |
| Specimen testing - Waste bag                           | 729     | 1,300      | 0.06   |
| Sample decontamination - Waste disposal                | 11      | 40,000     | 1.81   |

VND: Vietnamese dong. *“The unit costs for the laboratory equipment have been annualized and account for the proportion equipment would be used for used for the screening (100%). Values are in 2016 prices.*

*Projected costs associated with school-based screening to inform deployment of Dengvaxia: Vietnam as a case study*

School-based serosurvey

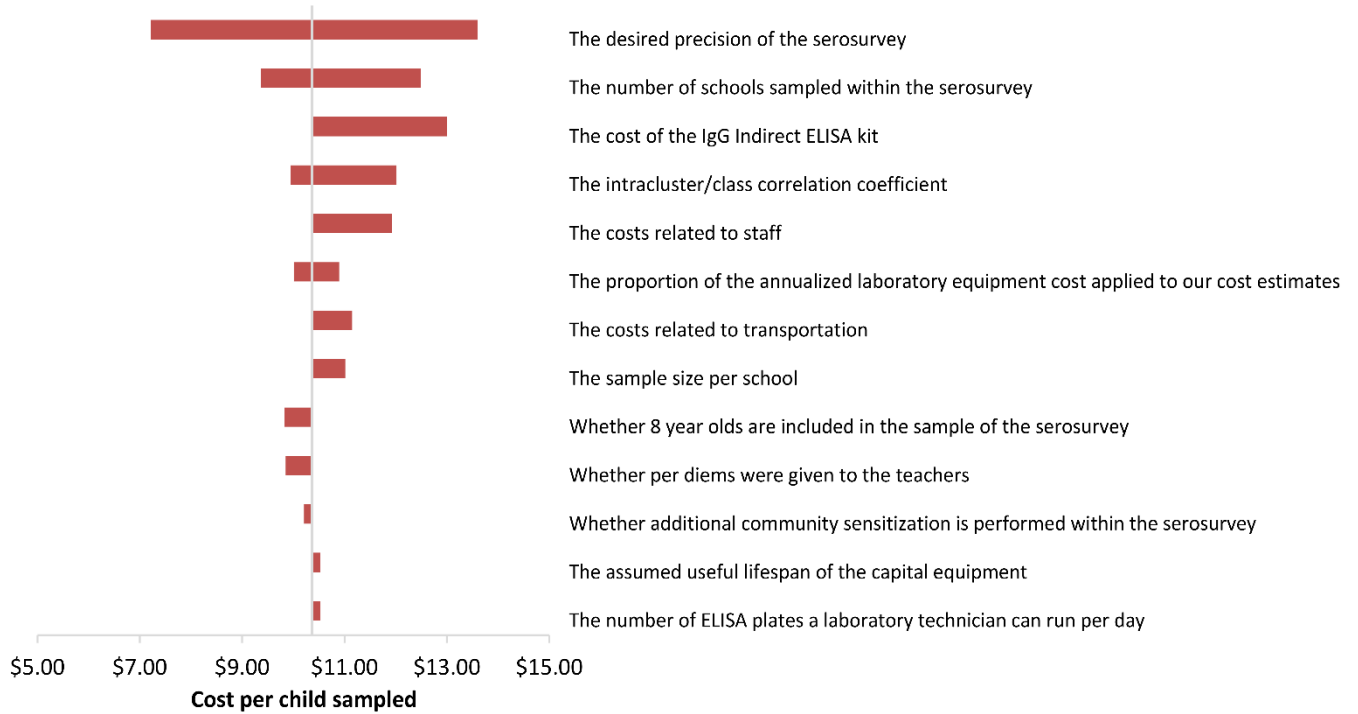

**Supporting Figure S1: Tornado plot illustrating the impact of the sensitivity analysis on the estimated costs per test of the school-based serosurvey. The ranges investigated are shown in Table 2.**
